# Supplementary material for: The Neglected C of Intercultural Relations. Cross-Cultural Adaptation Shapes Sojourner Representations of Locals
Source: Front Psychol. 2021 Mar 23;12:611630. doi: 10.3389/fpsyg.2021.611630 (PMC8021927; doi:10.3389/fpsyg.2021.611630)
Supplement: Data Sheet 1 — Appendix A and B. [file Data_Sheet_1.xlsx]

## Sheet: Appendix A
Appendix A.
Results of Exploratory Factor Analyses in Study 1. Supplementary Material for the Paper "The Neglected C of Intercultural Relations. Cross-Cultural Adaptation Shapes Sojourner Representations of Locals"
Evaluation 1 (PT)												Evaluation 2 (US)
Low Adaptation CI				Moderate Adaptation CI				High Adaptation CI				Moderate Adaptation CI					High Adaptation
Adjective	Factor			Adjective	Factor			Adjective	Factor			Adjective	Factor				Adjective	Factor
	1	2			1	2			1	2			1	2	3			1	2
Trustworthy	0.948			Helpful	0.926			Friendly	0.96			Competent	0.936				Competent	0.87
Friendly	0.886			Tolerant	0.905			Trustworthy	0.933			Interesting	0.904				Intelligent	0.867
Competent	0.867			Friendly	0.861			Tolerant	0.917			Intelligent	0.837				Friendly	0.839
Helpful	0.841			Trustworthy	0.848			Competent	0.899			Sociable	0.687				Interesting	0.806
Intelligent	0.829			Competent	0.823			Sociable	0.895			Trustworthy	0.685				Helpful	0.726
Tolerant	0.82			Sociable	0.806			Helpful	0.878			Helpful	0.672		0.337		Sociable	0.725
Interesting	0.742			Intelligent	0.785	0.363		Interesting	0.827			Attractive	0.669		-0.306		Trustworthy	0.716
Sociable	0.694			Interesting	0.785			Attractive	0.745			Friendly	0.668		0.381		Attractive	0.698
Attractive	0.682			Attractive	0.773			Intelligent	0.725			Aggressive		0.977			Tolerant	0.575
Dangerous		0.974		Aggressive		0.963		Aggressive		0.922		Dangerous		0.867			Dangerous		0.95
Aggressive		0.935		Dangerous		0.958		Dangerous		0.919		Closed-minded		0.795			Aggressive		0.818
Closed-minded		0.753		Closed-minded		0.86		Closed-minded		0.753		Tolerant			0.628		Closed-minded		0.71
Factor Correlations
		Factor 1				Factor 1				Factor 1				Factor 1	Factor 2				Factor 1
	Factor 2	0.066			Factor 2	0.06			Factor 2	0.065			Factor 2	-0.404				Factor 2	-0.493
													Factor 3	0.273	-0.188
Note: Exploratory Factor Analyses were conducted for ratings of each CI separately. Extraction method: principal axis factoring, rotation method: oblimin with Kaiser Normalization. Loadings < .30 are not reported. In Evaluation 2 (US), only one factor was extracted for ratings of the low adaptation CI, hence results are not reported.

## Sheet: Appendix B
Appendix B.
Evaluations of Classification Images on Individual Adjectives Across Studies 1-3. Supplementary Material for the Paper "The Neglected C of Intercultural Relations. Cross-Cultural Adaptation Shapes Sojourner Representations of Locals"
			Tolerant						Closed-minded						Aggressive						Dangerous						Interesting						Attractive						Trustworthy						Helpful
			Mlow	SElow	Mmod	SEmod	Mhigh	SEhigh	Mlow	SElow	Mmod	SEmod	Mhigh	SEhigh	Mlow	SElow	Mmod	SEmod	Mhigh	SEhigh	Mlow	SElow	Mmod	SEmod	Mhigh	SEhigh	Mlow	SElow	Mmod	SEmod	Mhigh	SEhigh	Mlow	SElow	Mmod	SEmod	Mhigh	SEhigh	Mlow	SElow	Mmod	SEmod	Mhigh	SEhigh	Mlow	SElow	Mmod	SEmod	Mhigh
Study 1
	Evaluation 1 (PT)		4.47	0.29	4.98	0.27	4.43	0.25	3.24	0.33	3.02	0.31	3.22	0.31	3.08	0.34	2.29	0.26	2.88	0.31	2.92	0.33	2.31	0.27	2.84	0.3	4.28	0.31	4.55	0.32	4.59	0.32	3.71429	0.363046	4.12245	0.332012	4.28571	0.337558	4.22449	0.283121	4.93878	0.272629	4.7551	0.286503	4.08163	0.276391	5.14286	0.2751	4.59184
			Greenhouse-Geisser F(1.67, 80.05) = 2.86, p = .07, hp2 = .06						F(2, 96) = 0.31, p = .73, hp2 = .01						F(2, 96) = 3.98, p = .02, hp2 = .08						F(2, 96) = 2.61, p = .08, hp2 = .05						F(2, 96) = 0.56, p = .57, hp2 = .01						F(2, 96) = 2.36, p = .10, hp2 = .05						F(2, 96) = 4.07, p = .02, hp2 = .08						F(2, 96) = 6.91, p = .002, hp2 = .13
			Quadratic contrast: F(1, 48) = 7.77, p = .01, hp2 = .14						Quadratic contrast: F(1, 48) = 0.74, p = .39, hp2 = .02						Quadratic contrast: F(1, 48) = 6.74, p = .01, hp2 = .12						Quadratic contrast: F(1, 48) = 4.48, p = .04, hp2 = .09						Quadratic contrast: F(1, 48) = 0.20, p = .65, hp2 = .00						Quadratic contrast: F(1, 48) = 0.36, p = .55, hp2 = .01						Quadratic contrast: F(1, 48) = 4.00, p = .05, hp2 = .08						Quadratic contrast: F(1, 48) = 13.48, p = .001, hp2 = .22
			Linear contrast: F(1, 48) = 0.02, p = .89, hp2 = .00						Linear contrast: F(1, 48) = 0.00, p = .95, hp2 = .00						Linear contrast: F(1, 48) = 0.54, p = .46, hp2 = .01						Linear contrast: F(1, 48) = 0.92, p = .76, hp2 = .00						Linear contrast: F(1, 48) = 0.81, p = .37, hp2 = .02						Linear contrast: F(1, 48) = 3.56, p = .06, hp2 = .07						Linear contrast: F(1, 48) = 4.13, p = .05, hp2 = .08						Linear contrast: F(1, 48) = 2.64, p = .11, hp2 = .05
	Evaluation 2 (US)		5.16	0.254526	5.62	0.276848	5.48	0.306714	3.5	0.283203	3.12	0.318978	2.98	0.264174	3.88	0.325313	3.28	0.315633	3.2	0.315582	3.26	0.336622	2.76	0.331429	2.92	0.331773	5.9	0.25435	5.82	0.222582	5.84	0.262422	5.44	0.310576	5.46	0.291667	5.66	0.308532	5.52	0.268389	5.42	0.285843	5.62	0.289813	5.78	0.256013	6.04	0.273988	5.84
			F(2, 98) = 1.60, p = .21, h2 = .03						Greenhouse-Geisser F(1.75, 85.96) = 1.87, p = .16, h2 = .04						F(2, 98) = 3.71, p = .03, h2 = .07						F(2, 98) = 2.00, p = .14, h2 = .04						F(2, 98) = 0.05, p = .95, h2 = .00						F(2, 98) = 0.69, p = .50, h2 = .01						F(2, 98) = 029, p = .75, h2 = .01						F(2, 98) = 0.50, p = .61, h2 = .01
			Quadratic contrast: F(1, 49) = 1.72, p = .19, hp2 = .03						Quadratic contrast: F(1, 49) = 0.26, p = .61, hp2 = .01						Quadratic contrast: F(1, 49) = 1.30, p = .26, hp2 = .03						Quadratic contrast: F(1, 49) = 2.78, p = .10, hp2 = .05						Quadratic contrast: F(1, 49) = 0.08, p = .78, hp2 = .00						Quadratic contrast: F(1, 49) = 0.25, p = .62, hp2 = .01						Quadratic contrast: F(1, 49) = 0.43, p = .51, hp2 = .01						Quadratic contrast: F(1, 49) = 1.01, p = .32, hp2 = .02
			Linear contrast: F(1, 49) = 1.49, p = .23, hp2 = .03						Linear contrast: F(1, 49) = 3.34, p = .07, hp2 = .06						Linear contrast: F(1, 49) = 5.81, p = .02, hp2 = .11						Linear contrast: F(1, 49) = 1.48, p = .23, hp2 = .03						Linear contrast: F(1, 49) = 0.04, p = .84, hp2 = .00						Linear contrast: F(1, 49) = 1.16, p = .29, hp2 = .02						Linear contrast: F(1, 49) = 0.15, p = .70, hp2 = .00						Linear contrast: F(1, 49) = 1.01, p = .83, hp2 = .00
	Evaluation 3 (PT)		4.31373	0.283522	5.07843	0.346233	4.5098	0.327046	3.35294	0.354051	2.60784	0.30432	3.15686	0.35796	2.96078	0.297652	2.37255	0.302876	2.60784	0.267272	2.90196	0.304547	2.33333	0.323785	2.64706	0.281207	3.4902	0.324639	4	0.324188	4.05882	0.313627	3.17308	0.291562	3.55769	0.359543	3.88462	0.338185	3.88235	0.298555	5.09804	0.351194	4.2549	0.294849	4.07692	0.295576	4.90385	0.32639	4.75
			F(2, 100) = 3.41, p = .04, hp2 = .06						F(2, 100) = 3.03, p = .05, hp2 = .06						F(2, 100) = 2.09, p = .13, hp2 = .04						F(2, 100) = 2.24, p = .11, hp2 = .04						F(2, 100) = 2.57, p = .08, hp2 = .05						F(2, 102) = 2.47, p = .09, hp2 = .05						Greenhouse-Geisser F(1.73, 86.49) = 9.81, p < .001, hp2 = .16						F(2, 102) = 4.95, p = .01, hp2 = .09
			Quadratic contrast: F(1, 50) = 6.75, p = .01, hp2 = .12						Quadratic contrast: F(1, 50) = 4.83, p = .03, hp2 = .09						Quadratic contrast: F(1, 50) = 2.55, p = .12, hp2 = .05						Quadratic contrast: F(1, 50) = 3.67, p = .06, hp2 = .07						Quadratic contrast: F(1, 50) = 1.24, p = .27, hp2 = .02						Quadratic contrast: F(1, 51) = 0.01, p = .91, hp2 = .00						Quadratic contrast: F(1, 50) = 13.07, p = .001, hp2 = .21						Quadratic contrast: F(1, 51) = 3.81, p = .06, hp2 = .07
			Linear contrast: F(1, 50) = 0.39, p = .53, hp2 = .01						Linear contrast: F(1, 50) = 0.47, p = .50, hp2 = .01						Linear contrast: F(1, 50) = 1.58, p = .22, hp2 = .03						Linear contrast: F(1, 50) = 0.87, p = .35, hp2 = .02						Linear contrast: F(1, 50) = 3.32, p = .08, hp2 = .06						Linear contrast: F(1, 51) = 4.21, p = .05, hp2 = .08						Linear contrast: F(1, 50) = 2.77, p = .10, hp2 = .05						Linear contrast: F(1, 51) = 6.28, p = .02, hp2 = .11
Study 2
	Evaluation 1 (PT)		4.06667	0.35873	4.46667	0.321926	4.6	0.320038	3.42222	0.360259	3.22222	0.349442	3.04444	0.358103	2.88636	0.344415	3.65909	0.412468	2.68182	0.327997	2.68889	0.355082	3.15556	0.369214	2.17778	0.266456	3.73333	0.303847	4.04444	0.363701	4.11111	0.326014	3.13333	0.331205	2.91111	0.319125	3.35556	0.346928	4.02222	0.272454	3.95556	0.29294	4.57778	0.332558	3.95556	0.308066	3.91111	0.302885	4.6
			Greenhouse-Geisser F(1.72, 75.53) = 1.32, p = .27, hp2 = .03						F(2, 88) = 0.38, p = .68, hp2 = .01						F(2, 86) = 2.90, p = .06, hp2 = .06						F(2, 88) = 3.59, p = .03, hp2 = .08						Greenhouse-Geisser F(1.72, 75.56) = 1.05, p = .36, hp2 = .02						F(2, 88) = 1.98, p = .15, hp2 = .04						F(2, 88) = 2.91, p = .06, hp2 = .06						F(2, 88) = 3.40, p = .04, hp2 = .07
			Quadratic contrast: F(1, 44) = 0.15, p = .71, hp2 = .00						Quadratic contrast: F(1, 44) = 0.00, p = .98, hp2 = .00						Quadratic contrast: F(1, 43) = 4.86, p = .03, hp2 = .10						Quadratic contrast: F(1, 44) = 4.35, p = .04, hp2 = .09						Quadratic contrast: F(1, 44) = 0.24, p = .63, hp2 = .01						Quadratic contrast: F(1, 44) = 2.44, p = .13, hp2 = .05						Quadratic contrast: F(1, 44) = 2.33, p = .13, hp2 = .05						Quadratic contrast: F(1, 44) = 4.03, p = .15, hp2 = .05
			Linear contrast: F(1, 44) = 3.68, p = .05, hp2 = .09						Linear contrast: F(1, 44) = 0.74, p = .40, hp2 = .02						Linear contrast: F(1, 43) = 0.27, p = .61, hp2 = .01						Linear contrast: F(1, 44) = 2.45, p = .13, hp2 = .05						Linear contrast: F(1, 44) = 1.96, p = .17, hp2 = .04						Linear contrast: F(1, 44) = 1.26, p = .27, hp2 = .03						Linear contrast: F(1, 44) = 3.34, p = .08, hp2 = .07						Linear contrast: F(1, 44) = 4.61, p = .04, hp2 = .10
	Evaluation 2 (US)		4.92727	0.270745	5	0.292441	5.56364	0.252614	4.10909	0.288585	4.23636	0.327179	3.49091	0.288818	4.10909	0.304481	4.36364	0.318206	3.29091	0.24846	3.4	0.286156	3.85455	0.34856	2.92727	0.252735	5.05455	0.288288	5.18182	0.299372	5.50909	0.258033	5.07273	0.299106	5.05455	0.271445	5.76364	0.280648	5.03636	0.277026	4.67273	0.315753	5.34545	0.239554	4.90909	0.273736	4.78182	0.261684	5.65455
			F(2, 108) = 2.74, p = .07, hp2 = .05						Greenhouse-Geisser F(1.75, 94.55) =2.19, p = .12, hp2 = .04						F(2, 108) = 4.67, p = .01, hp2 = .08						Greenhouse-Geisser F(1.74, 94.07) = 3.23, p = .05, hp2 = .06						F(2, 108) = 1.20, p = .31, hp2 = .02						F(2, 108) = 4.22, p = .02, hp2 = .07						Greenhouse-Geisser F(1.80, 97.10) = 2.71, p = .08, hp2 = .05						F(2, 108) = 4.54, p = .01, hp2 = .08
			Quadratic contrast: F(1, 54) = 0.79, p = .38, hp2 = .01						Quadratic contrast: F(1, 54) = 1.27, p = .26, hp2 = .02						Quadratic contrast: F(1, 54) = 3.44, p = .07, hp2 = .06						Quadratic contrast: F(1, 54) = 3.67, p = .06, hp2 = .06						Quadratic contrast: F(1, 54) = 0.13, p = .72, hp2 = .00						Quadratic contrast: F(1, 54) = 2.03, p = .16, hp2 = .04						Quadratic contrast: F(1, 54) = 3.20, p = .08, hp2 = .06						Quadratic contrast: F(1, 54) = 3.06, p = .09, hp2 = .05
			Linear contrast: F(1, 54) = 5.40, p = .02, hp2 = .09						Linear contrast: F(1, 54) = 4.22, p = .05, hp2 = .07						Linear contrast: F(1, 54) = 6.81, p = .01, hp2 = .11						Linear contrast: F(1, 54) = 2.62, p = .11, hp2 = .05						Linear contrast: F(1, 54) = 5.68, p = .12, hp2 = .05						Linear contrast: F(1, 54) = 7.03, p = .01, hp2 = .12						Linear contrast: F(1, 54) = 1.71, p = .20, hp2 = .03						Linear contrast: F(1, 54) = 6.40, p = .01, hp2 = .11
Study 3
	Evaluation 1 (PT)		3.71739	0.328462	3.97826	0.297313	4.6087	0.335469	3.90698	0.308273	3.53488	0.311017	3.32558	0.377555	3.52273	0.333931	3.25	0.305214	2.70455	0.316194	3.51163	0.384316	3.2093	0.291173	2.5814	0.338115	3.08889	0.274915	3.71111	0.27638	4.02222	0.302329	2.08889	0.251906	3.15556	0.306422	3.8	0.356186	3.57778	0.313805	3.62222	0.246775	4.11111	0.288189	3.91304	0.335969	4.26087	0.26997	4.69565
			F(2, 90) = 3.30, p = .04, hp2 = .07						F(2, 84) = 0.95, p = .39, hp2 = .02						F(2, 86) = 2.70, p = .07, hp2 = .06						F(2, 84) = 3.59, p = .03, hp2 = .08						F(2, 88) = 4.80, p = .01, hp2 = .10						Greenhouse-Geisser F(1.65, 72.54) = 15.61, p < .001, hp2 = .26						F(2, 88) = 1.92, p = .15, hp2 = .04						F(2, 90) = 7.071, p = .10, hp2 = .05
			Quadratic contrast: F(1, 45) = 0.45, p = .51, hp2 = .01						Quadratic contrast: F(1, 42) = 0.06, p = .81, hp2 = .001						Quadratic contrast: F(1, 43) = 0.19, p = .66, hp2 = .004						Quadratic contrast: F(1, 42) = 0.31, p = .51, hp2 = .01						Quadratic contrast: F(1, 44) = 0.49, p = .49, hp2 = .01						Quadratic contrast: F(1, 44) = 1.00, p = .32, hp2 = .02						Quadratic contrast: F(1, 44) = 0.96, p = .33, hp2 = .02						Quadratic contrast: F(1, 45) = 0.02, p = .89, hp2 = .00
			Linear contrast: F(1, 45) = 5.20, p = .03, hp2 = .10						Linear contrast: F(1, 42) = 7.27, p = .22, hp2 = .04						Linear contrast: F(1, 43) = 5.22, p = .03, hp2 = .11						Linear contrast: F(1, 42) = 6.40, p = .01, hp2 = .13						Linear contrast: F(1, 44) = 7.10, p = .01, hp2 = .14						Linear contrast: F(1, 44) = 22.19, p < .001, hp2 = .34						Linear contrast: F(1, 44) = 2.50, p < .12, hp2 = .05						Linear contrast: F(1, 45) = 5.08, p = .03, hp2 = .10
	Evaluation 2 (US)		4.46296	0.240418	5.05556	0.292483	4.98148	0.284089	4.53704	0.319102	3.94444	0.287665	3.42593	0.279265	4.48148	0.284396	4.12963	0.299133	3.40741	0.257003	3.7037	0.284259	3.40741	0.293796	3.37037	0.281377	4.57407	0.292704	5.31481	0.268057	5.38889	0.313249	4.09259	0.286267	5.14815	0.273966	5.38889	0.314362	4.44444	0.285531	4.88889	0.287968	5.03704	0.269538	4.83333	0.257318	5.01852	0.266314	5.38889
			F(2, 106) = 2.91, p = .06, hp2 = .05						Greenhouse-Geisser F(1.72, 91.16) = 4.90, p = .01, hp2 = .09						F(2, 106) = 6.70, p = .002, hp2 = .11						F(2, 106) = 0.89, p = .41, hp2 = .02						F(2, 106) = 5.48, p = .01, hp2 = .09						Greenhouse-Geisser F(1.68, 88.94) = 12.33, p < .001, hp2 = .19						F(2, 106) = 2.51, p = .09, hp2 = .05						F(2, 106) = 2.11, p = .13, hp2 = .04
			Quadratic contrast: F(1, 53) = 1.85, p = .18, hp2 = .03						Quadratic contrast: F(1, 53) = 0.02, p = .89, hp2 = .00						Quadratic contrast: F(1, 53) = 0.50, p = .48, hp2 = .01						Quadratic contrast: F(1, 53) = 0.37, p = .55, hp2 = .01						Quadratic contrast: F(1, 53) = 1.98, p = .17, hp2 = .04						Quadratic contrast: F(1, 53) = 5.11, p = .03, hp2 = .09						Quadratic contrast: F(1, 53) = 0.35, p = .56, hp2 = .01						Quadratic contrast: F(1, 45) = 0.18, p = .67, hp2 = .00
			Linear contrast: F(1, 53) = 4.24, p = .04, hp2 = .07						Linear contrast: F(1, 53) = 7.50, p = .01, hp2 = .12						Linear contrast: F(1, 53) = 13.12, p < .001, hp2 = .20						Linear contrast: F(1, 53) = 1.24, p = .27, hp2 = .02						Linear contrast: F(1, 53) = 9.04, p = .004, hp2 = .15						Linear contrast: F(1, 53) = 15.16, p < .001, hp2 = .22						Linear contrast: F(1, 53) = 5.15, p = .03, hp2 = .09						Linear contrast: F(1, 45) = 3.51, p = .07, hp2 = .06
Note. Mean evaluations and standard errors of Classification Images (CIs) obtained in the three studies are reported. Indexes low, mod, high refer to mean evaluations of the low adaptation CI, moderate adaptation CI and high adaptation CI, respectively.
[truncated: 37 more columns]
